# Supplementary material for: Mitochondrial DNA suggests at least 11 origins of parasitism in angiosperms and reveals genomic chimerism in parasitic plants
Source: PubMed Central journal article supplement (PMC2234419; doi:10.1186/1471-2148-7-248), 2007-12-21
Supplement: 1471-2148-7-248-S1.pdf [file 1471-2148-7-248-S1.pdf]

Table 1. List of species sampled, voucher numbers with herbarium acronyms, and GenBank accession numbers. Sequences obtained from GenBank and DNA obtained from other published studies do not list voucher information.

|                                   |                  |          |                                   |                  |          |                                   |                  |          |
|-----------------------------------|------------------|----------|-----------------------------------|------------------|----------|-----------------------------------|------------------|----------|
| <i>Staphylea trifoliata</i>       | N/A              | AY453105 | <i>Staphylea trifoliata</i>       | TJB 354 (WMU)    | EU281075 | <i>Staphylea trifoliata</i>       | TJB 354 (WMU)    | EU281001 |
| <i>Symphoricarpos orbiculatus</i> | CWD 97.801 (PAC) | EU281122 | <i>Symphoricarpos orbiculatus</i> | CWD 97.801 (PAC) | EU281069 | <i>Symphoricarpos orbiculatus</i> | CWD 97.801 (PAC) | EU280994 |
| <i>Tamarix parviflora</i>         | N/A              | AY453117 | <i>Tamarix parviflora</i>         | DHG 1427 (TEX)   | EU281070 | <i>Tamarix parviflora</i>         | DHG 1427 (TEX)   | EU280995 |
| <i>Tetrastigma diepenhorstii</i>  | N/A              | AY453109 | <i>Tetrastigma diepenhorstii</i>  | TJB403 (WMU)     | EU281091 | <i>Tetrastigma diepenhorstii</i>  | TJB403 (WMU)     | EU281016 |
| <i>Vaccinium uliginosum</i>       | N/A              | AF421035 | <i>Vaccinium arboreum</i>         | CWD 97.310 (PAC) | EU281025 | <i>Vaccinium arboreum</i>         | CWD 97.310 (PAC) | EU280953 |
| <i>Vitis riparia</i>              | N/A              | AY453123 | <i>Vitis sp.</i>                  | CWD 96.701 (PAC) | EU281071 | <i>Vitis sp.</i>                  | CWD 96.701 (PAC) | EU280996 |
| <i>Zamia floridana</i>            | N/A              | AF197721 | <i>Zamia furfuracea</i>           | N/A              | AF020583 | <i>Zamia furfuracea</i>           | LMB 283 (PAC)    | EU280998 |
| <i>Zea mays</i>                   | N/A              | UO 9987  | <i>Zea mays</i>                   | N/A              | AF542203 | <i>Zea mays</i>                   | N/A              | AY506529 |
