# Supplementary material for: Mitochondrial DNA suggests at least 11 origins of parasitism in angiosperms and reveals genomic chimerism in parasitic plants
Source: PubMed Central journal article supplement (PMC2234419; doi:10.1186/1471-2148-7-248), 2007-12-21
Supplement: 1471-2148-7-248-S2.pdf [file 1471-2148-7-248-S2.pdf]

Table 2. List of species sampled, voucher numbers, and GenBank accession numbers for *coxI* intron. Sequences obtained from GenBank do not have voucher information listed.

| Species Name                        | Voucher Number          | <i>coxI</i> |
|-------------------------------------|-------------------------|-------------|
| <i>Arisaema triphyllum</i>          | CWD96.310 (PAC)         | AY009426    |
| <i>Asclepias tuberosa</i>           | KRAL 70275 (BRIT)       | EU281054    |
| <i>Asimina triloba</i>              | CWD96.312 (PAC)         | AY009433    |
| <i>Brexia madagascarensis</i>       | N/A                     | AJ223413    |
| <i>Cassytha filiformis</i>          | CWD97.731 (PAC)         | EU281076    |
| <i>Catalpa fargesii</i>             | N/A                     | AJ223411    |
| <i>Clerodendrum trichotomum</i>     | N/A                     | AJ223414    |
| <i>Croton alabamensis</i>           | CWD96.303 (PAC)         | EU281037    |
| <i>Cucumis sativus</i>              | N/A                     | AJ223416    |
| <i>Cuscuta japonica</i>             | no voucher              | EU281077    |
| <i>Cynomorium coccineum</i>         | Hoder 18/Apr/1996 (PAC) | EU281023    |
| <i>Cytinus ruber</i>                | KES2738 (BOL)           | EU281022    |
| <i>Dendrophthoe pentandra</i>       | SNP15593 (SNP)          | EU281073    |
| <i>Digitalis purpurea</i>           | N/A                     | AJ223415    |
| <i>Diospyros virginiana</i>         | N/A                     | AJ223417    |
| <i>Epifagus virginiana</i>          | CWD 90.127 (PAC)        | EU281078    |
| <i>Frasera caroliniensis</i>        | CWD 97.537 (PAC)        | EU281038    |
| <i>Hebe subalpina</i>               | N/A                     | AJ223419    |
| <i>Hedychium coronarium</i>         | N/A                     | AJ223426    |
| <i>Heliotropium arborescens</i>     | N/A                     | AJ223425    |
| <i>Hevea brasiliensis</i>           | N/A                     | AJ223436    |
| <i>Hydnora africana</i>             | N/A                     | EU281079    |
| <i>Hydrocotyle rotundifolia</i>     | N/A                     | AJ223424    |
| <i>Ilex opaca</i>                   | CWD97.656 (PAC)         | EU281049    |
| <i>Ilex sp.</i>                     | N/A                     | AJ223429    |
| <i>Ipomoea coccinea x quamoclit</i> | JRM97.GRHS1083 (PAC)    | EU281050    |
| <i>Jasminum polyanthum</i>          | N/A                     | AJ247607    |
| <i>Lamium sp.</i>                   | N/A                     | AJ223428    |
| <i>Lennoa madreporoides</i>         | OY6 (PAC)               | EU281080    |
| <i>Lepionurus sylvestris</i>        | N/A                     | AJ223439    |
| <i>Malpighia glabra</i>             | N/A                     | AJ223433    |
| <i>Maranta leuconeura</i>           | N/A                     | AJ223432    |
| <i>Mitrastema yamamotoi</i>         | CWD 99.11 (SNP)         | EU281021    |
| <i>Nerium oleander</i>              | N/A                     | AJ223421    |
| <i>Ombrophytum subterraneum</i>     | CWD 94.17 (PAC)         | EU281081    |
| <i>Peperomia polybotrya</i>         | N/A                     | X87336      |
| <i>Philodendron oxycardium</i>      | N/A                     | AJ223438    |
| <i>Pholisma arenarium</i>           | OY26 (PAC)              | EU281083    |
| <i>Pilostyles thurberi</i> (TX)     | BLTurner 1999 (TEX)     | EU281018    |
| <i>Polygala sanguinea</i>           | CWD98.0804 (PAC)        | EU281061    |
| <i>Prosopanche americana</i>        | OY26 (PAC)              | EU281082    |
| <i>Rafflesia pricei</i>             | CWD 99.01 (SNP)         | EU281020    |
| <i>Rhamnus caroliniana</i>          | CWD96.315 (PAC)         | EU281063    |
| <i>Rhamnus cathartica</i>           | N/A                     | AJ223422    |
| <i>Rhizanthus lowii</i>             | SNP14705 (SNP)          | EU281019    |
| <i>Rhus glabra</i>                  | CWD97.522 (PAC)         | EU281065    |
| <i>Symplocos paniculata</i>         | N/A                     | AJ223435    |
| <i>Veronica agrestis</i>            | N/A                     | AJ223427    |
| <i>Vinca rosea</i>                  | N/A                     | AJ223423    |
